# Supplementary material for: A highly transparent and ultra-stretchable conductor with stable conductivity during large deformation
Source: PubMed Central journal article supplement (PMC6668389; doi:10.1038/s41467-019-11364-w), 2019-07-31
Supplement: 41467_2019_11364_MOESM2_ESM.pdf [file 41467_2019_11364_MOESM2_ESM.pdf]

## **Description of Additional Supplementary Files**

File Name: Supplementary Movie 1

Description: A movie showing the elasticity and recoverability of this conductor.

File Name: Supplementary Movie 2

Description: A movie showing the squeezing test of a PAA/IL ionogel.

File Name: Supplementary Movie 3

Description: A movie showing the squeezing test of a polyacrylamide/NaCl hydrogel.

File Name: Supplementary Movie 4

Description: A movie showing the squeezing test of this conductor.

File Name: Supplementary Movie 5

Description: A movie showing the transparent integrated sensory system can track the movements of a robotic finger with real-time capacitance signals.

File Name: Supplementary Movie 6

Description: A movie showing the transparent integrated sensory system can sense temperature stimulus with real-time resistive response.

File Name: Supplementary Movie 7

Description: A movie showing the transparent sensory system can recognize H<sub>2</sub>O.

File Name: Supplementary Movie 8

Description: A movie showing the transparent sensory system can recognize ethanol.
